# Supplementary material for: A surgical method for continuous intraportal infusion of gut microbial metabolites in mice
Source: PubMed Central journal article supplement (PMC8262340; doi:10.1172/jci.insight.145607), 2021-05-10

● SH ● Sham ● NS

**A**

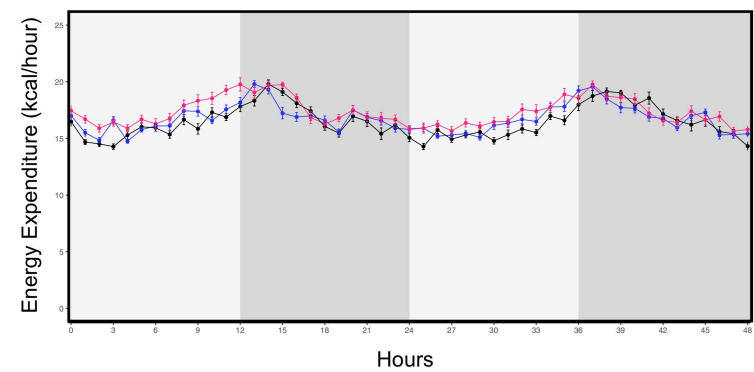

**B**

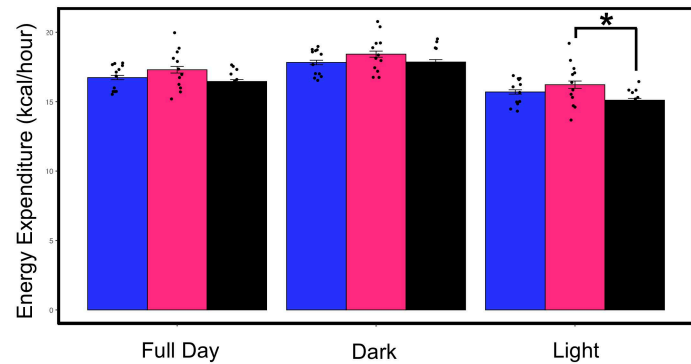

**C**

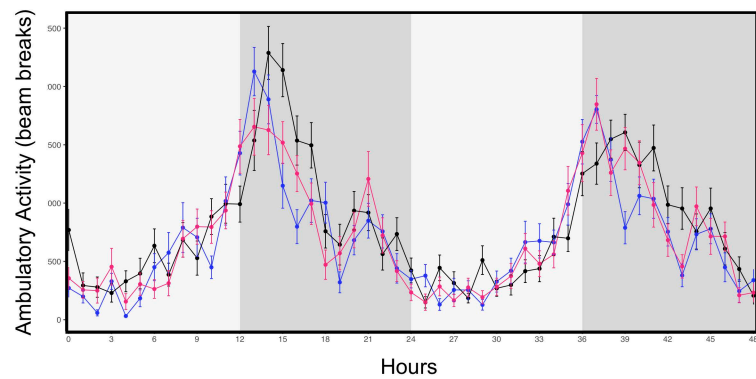

**D**

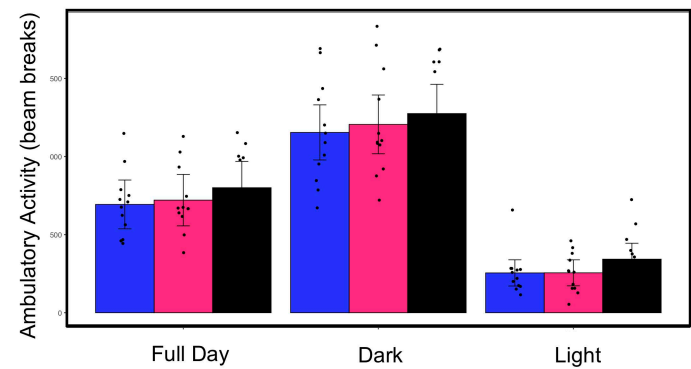

**E**

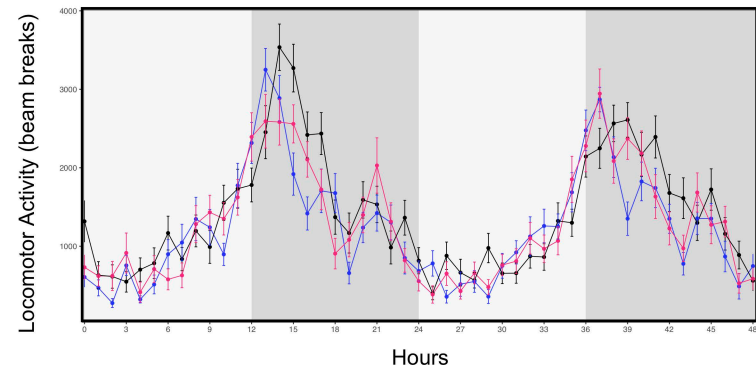

**F**

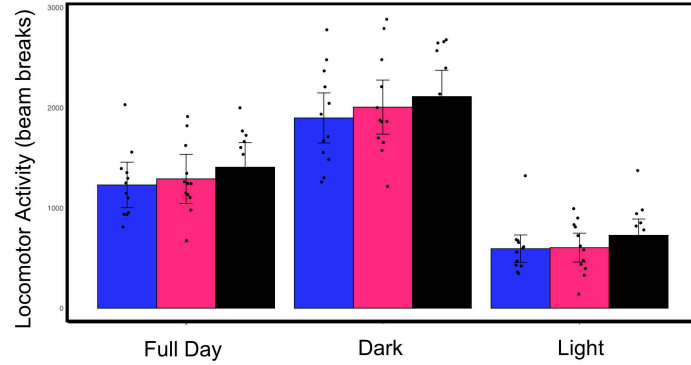

**A**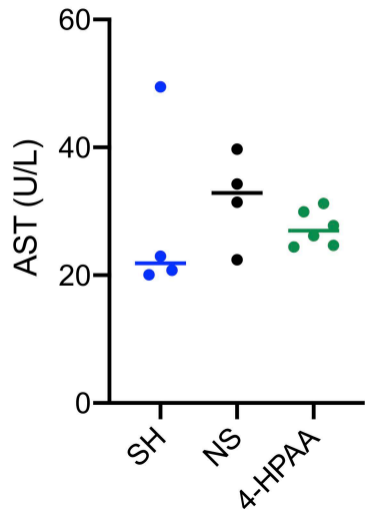**B**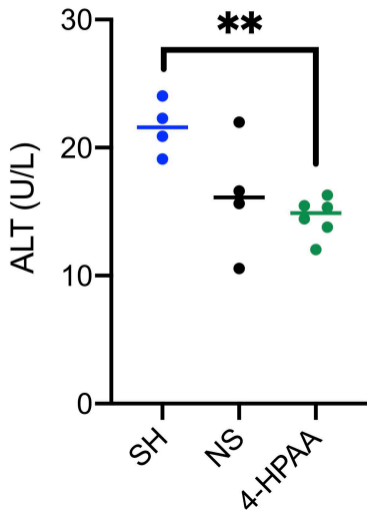

Supplement: jciinsight-6-145607-s307.pdf [file jciinsight-6-145607-s307.pdf]
